# Supplementary material
Source: PubMed Central journal article supplement (PMC4563672)
Supplement: JCI76099sd.pdf [file JCI76099sd.pdf]

## Supplemental Figure Legends

### Supplementary Figure 1

*Sepp1* message is decreased in human cancer and tumors from mice subjected to the AOM/DSS protocol. **(A)** Human *SEPP1* mRNA expression at various stages of colon tumorigenesis (10-normals, 6-adenomas, 33-Stage I, 76-Stage 2, 82-Stage 3, 59-Stage 4 for combined total of 250 CRC samples, GSE17538). **(B)** Mouse *Sepp1* mRNA expression in tumors ( $n = 5$ ) isolated from AOM/DSS mice relative to adjacent non-malignant mucosa ( $n = 5$ ), normalized to GAPDH. \*\*\* $P < 0.001$ , 2-tailed unpaired  $t$  test.

### Supplementary Figure 2

Crypt apoptosis is increased and crypt proliferation is decreased in *Sepp1*<sup>-/-</sup> AOM/DSS-treated colons. **(A)** Quantification (left) and images (right) of crypt apoptosis (average TUNEL<sup>+</sup>/crypt; WT, 7; *Sepp1*<sup>+/-</sup>, 6; *Sepp1*<sup>-/-</sup>, 7). Intratumoral protein expression of cleaved caspase-3, caspase-3, cleaved PARP, and  $\beta$ -actin as a loading control with three replicates within each genotype (bottom right). Quantification is shown in Figure 3. **(B)** Representative images of TUNEL staining within the tumor high-powered field. **(C)** Quantification (left) and representative images (right) of crypt proliferation (average ki67<sup>+</sup>/crypt; WT, 8; *Sepp1*<sup>+/-</sup>, 5; *Sepp1*<sup>-/-</sup>, 8). **(D)** Representative images of ki67 staining within the tumor high-powered field. **(E)** Quantification (left) and representative images (right) of DNA damage (average 8-OHdG<sup>+</sup>/crypt; WT, 8; *Sepp1*<sup>+/-</sup>, 5; *Sepp1*<sup>-/-</sup>, 8). **(F)** Representative image of 8-hydroxyguanine staining within the tumor high-powered field. All images were taken at 40x magnification. \* $P < 0.05$ , \*\* $P < 0.01$ , \*\*\* $P < 0.001$ , 1-way ANOVA, Newman-Keuls Multiple Comparison Test.

### Supplementary Figure 3

Proliferation and DNA damage are increased in *Sepp1* <sup>$\Delta$ 240-361/ $\Delta$ 240-361</sup> colons post-AOM/DSS administration. **(A)** Representative intratumoral proliferation staining as determined by ki67 positivity. **(B)** Crypt and **(C)** intratumoral DNA damage as measured by 8-hydroxyguanine staining. Images taken at 40x magnification.

#### Supplementary Figure 4

Crypt proliferation and crypt and tumor apoptosis are unaltered in *Sepp1*<sup>Δ240-361/Δ240-361</sup> colons. **(A)** Quantification of crypt proliferation (ki67<sup>+</sup> cells/crypt; WT, 8; *Sepp1*<sup>Δ240-361/Δ240-361</sup>, 7). **(B)** Quantification of crypt (TUNEL<sup>+</sup> cells/crypt; WT, 8; *Sepp1*<sup>Δ240-361/Δ240-361</sup>, 8) and **(C)** intratumoral (TUNEL<sup>+</sup> cells/tumor HPF; WT, 5; *Sepp1*<sup>Δ240-361/Δ240-361</sup>, 13) apoptosis.

#### Supplementary Figure 5

Proliferation and DNA damage are increased in colons of *Sepp1*<sup>U40S/U40S</sup> mice. **(A)** Representative images of proliferation in crypts (ki67<sup>+</sup> cells/crypt) and **(B)** tumors (ki67<sup>+</sup> cells/tumor HPF). **(C)** Representative images of DNA damage in crypts (8-OHdG<sup>+</sup> cells/crypt) and **(D)** tumors (8-OHdG<sup>+</sup> cells/tumor HPF). HPF is 40x magnification.

#### Supplementary Figure 6

Apoptosis is unaltered in colons of *Sepp1*<sup>U40S/U40S</sup> mice post-AOM/DSS protocol. **(A)** Quantification of crypt (TUNEL<sup>+</sup> cells/crypt; WT, 7; *Sepp1*<sup>U40S/U40S</sup>, 7) and **(B)** intratumoral (TUNEL<sup>+</sup> cells/tumor HPF; WT, 6; *Sepp1*<sup>U40S/U40S</sup>, 17) apoptosis in colons of mice treated with the AOM/DSS protocol.

#### Supplementary Figure 7

Oxidoreductase proteins are alternatively regulated at the mRNA level in *Sepp1*<sup>-/-</sup> tumors, but expression of other selenoproteins is unaltered. **(A)** RNAseq analysis of significantly-altered antioxidant genes.

#### Supplementary Figure 8

Ingenuity pathway analysis of alterations in Canonical Signaling in *Sepp1*<sup>-/-</sup> tumor RNAseq data relative to WT data. The Wnt pathway was one of the most significantly altered pathways (highlighted in red).

#### Supplementary Figure 9

Ingenuity pathway analysis of *Sepp1*<sup>-/-</sup> tumor RNAseq data relative to WT data. WNT pathway alterations demonstrated in a pathway map. Genes highlighted with red are overexpressed and genes highlighted

with green are suppressed. Intensity of color indicates extent of expression where darker color indicates a greater expression change.

A

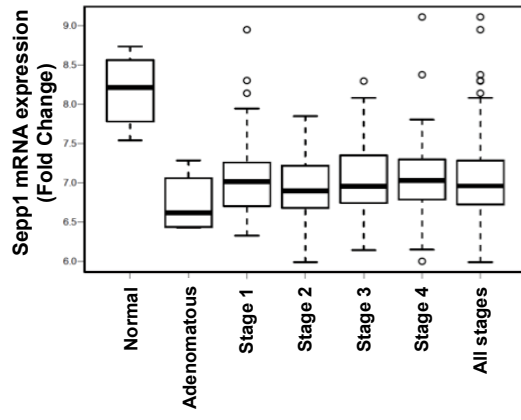

B

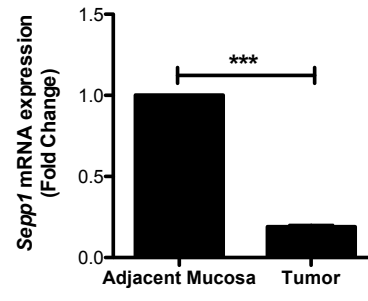

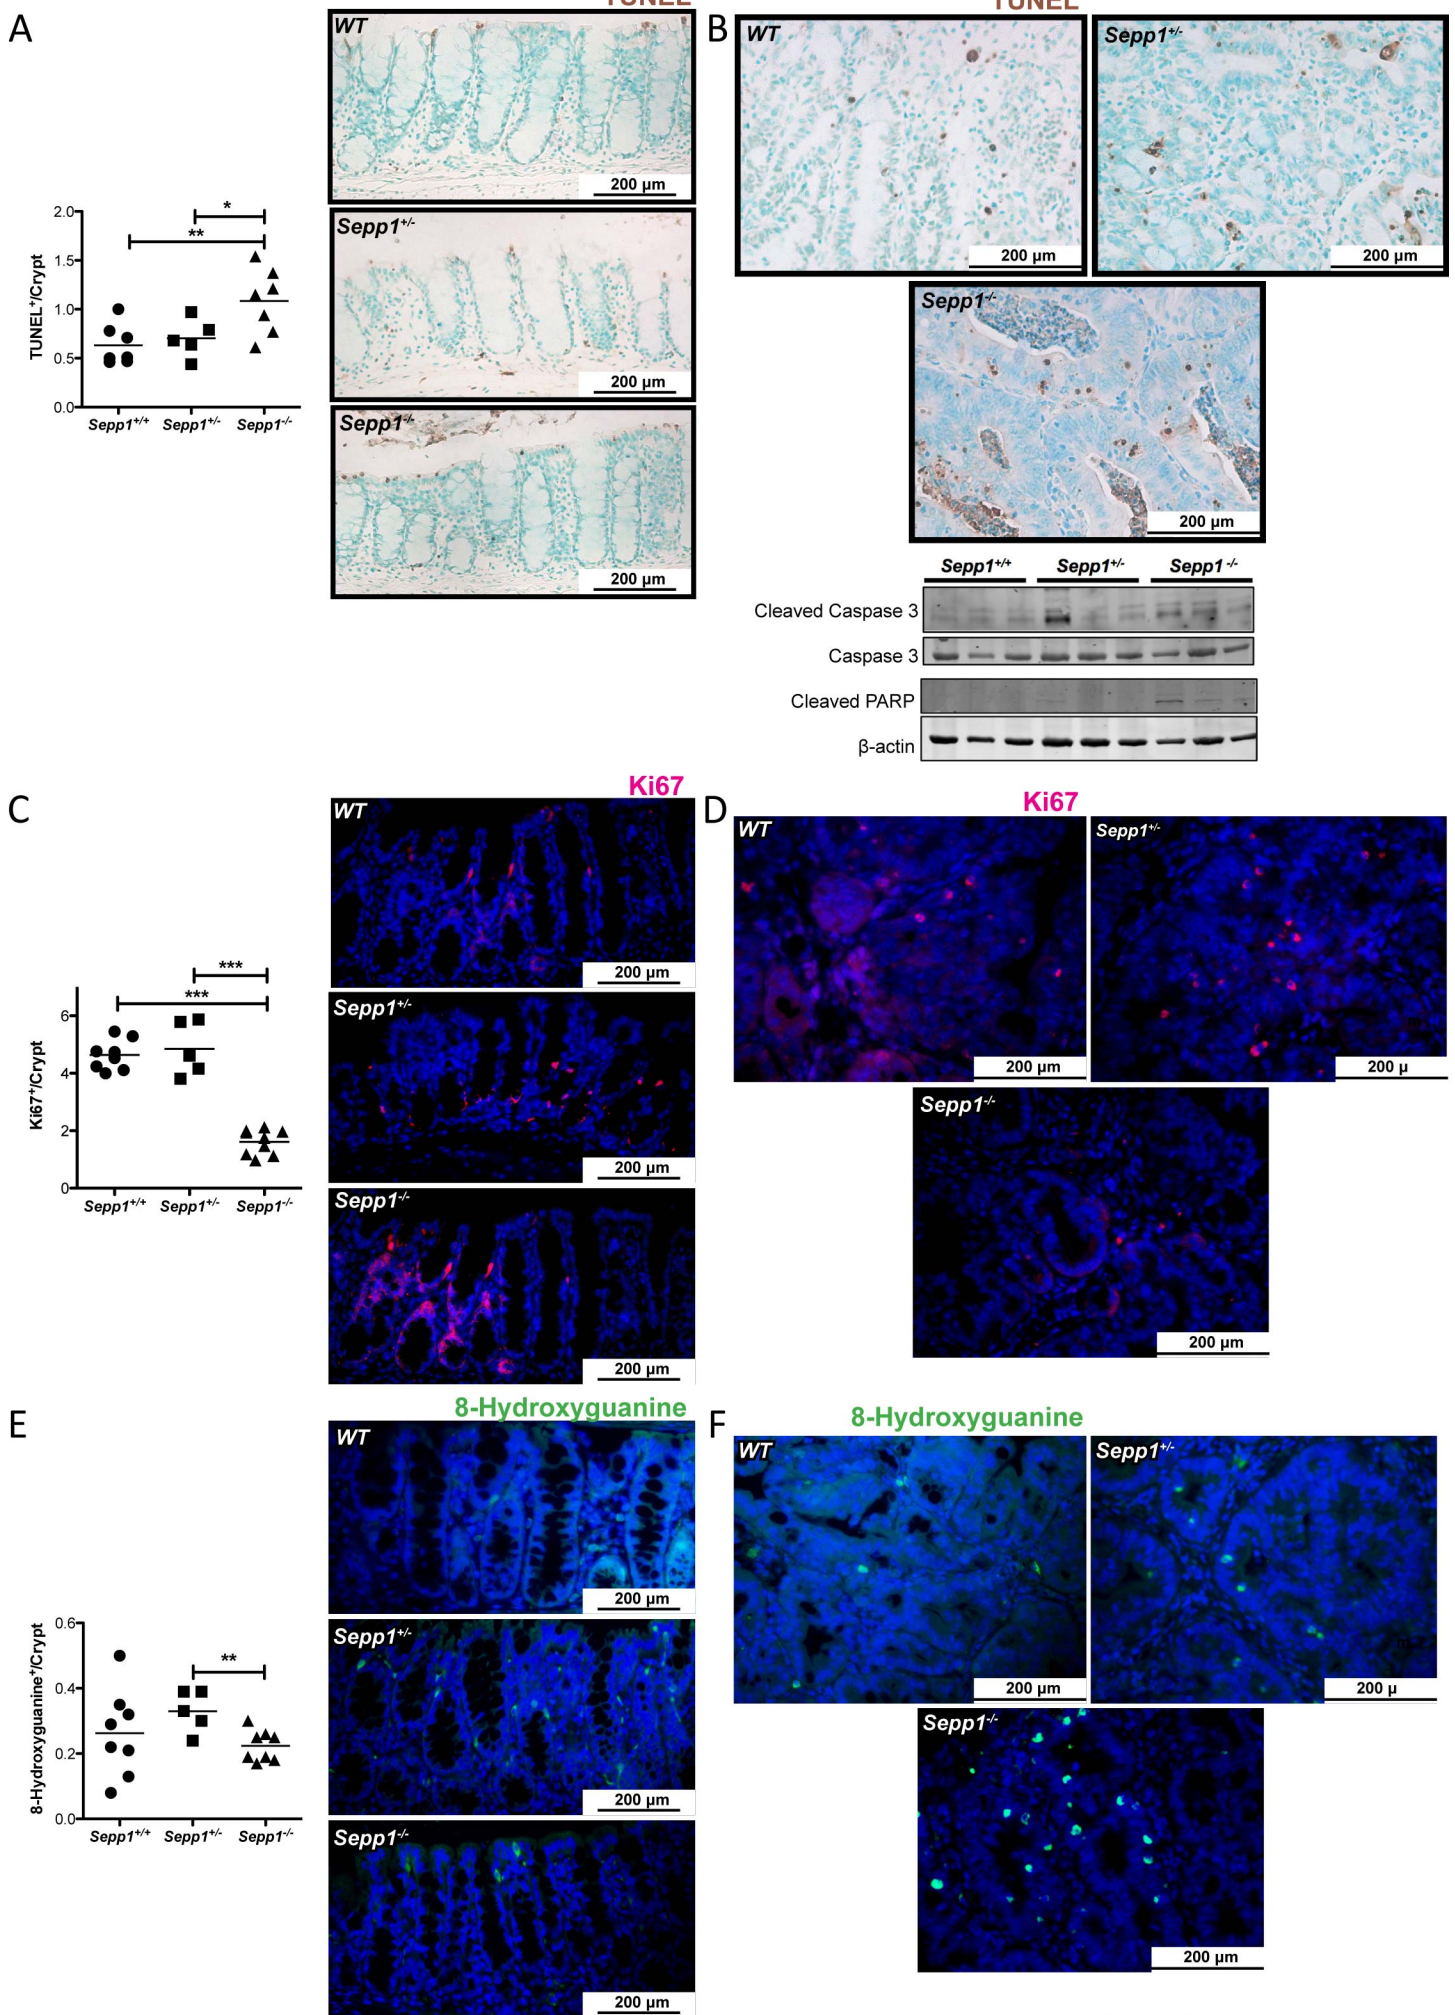

Supplementary Figure 2

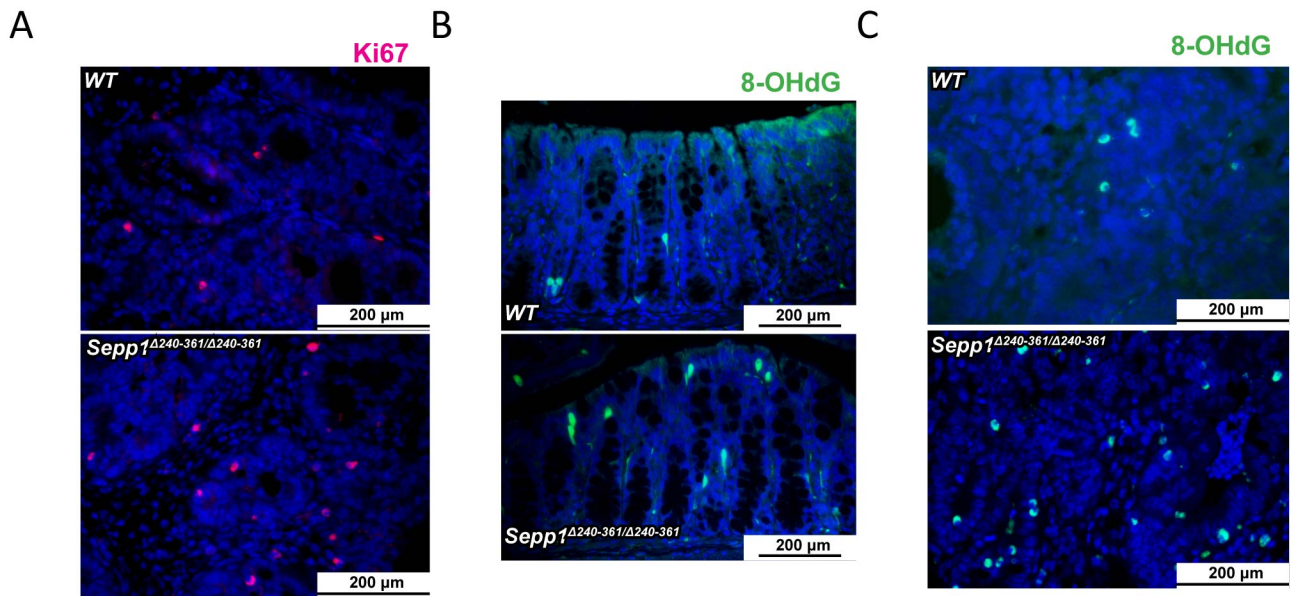

Supplementary Figure 3

A

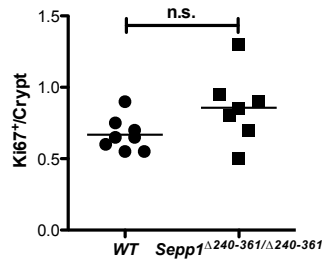

B

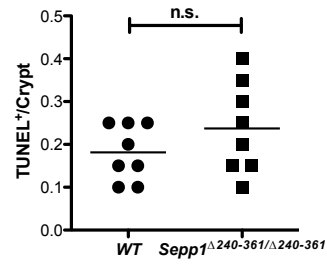

C

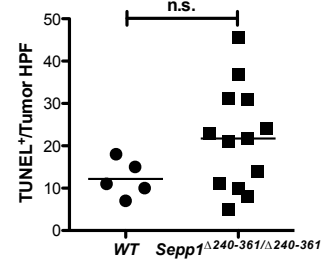

A

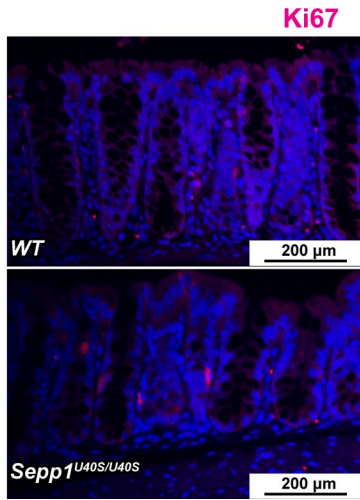

B

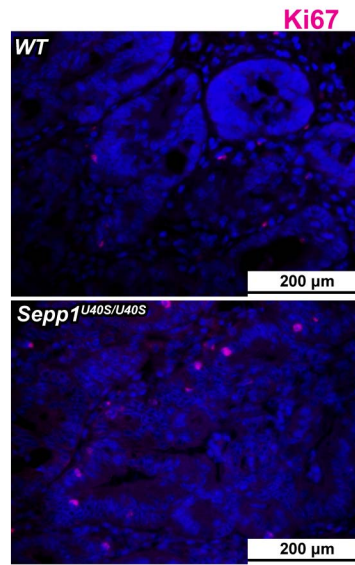

C

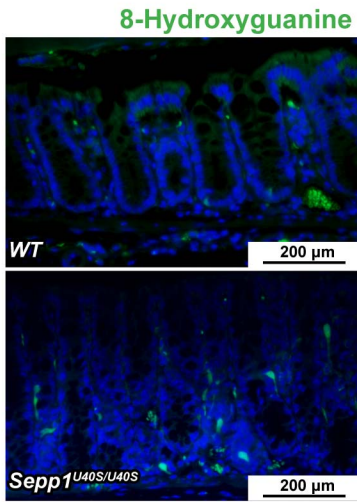

D

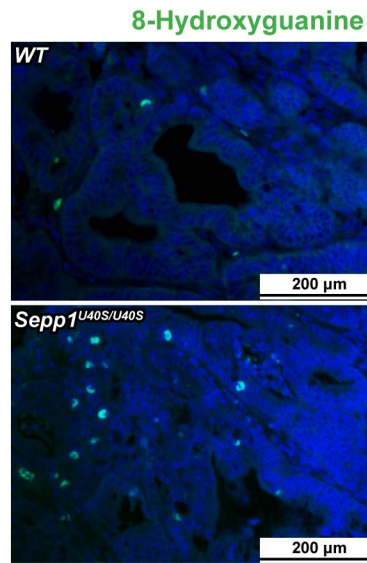



A

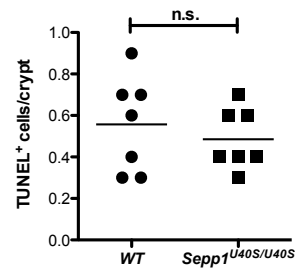

B

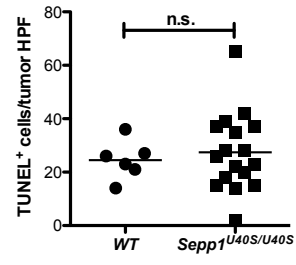

A

| <u>Gene Symbol</u> | <u>Gene Name</u>                                                 | <u>Enzymatic Activity</u> | <u>Fold Change</u> | <u>P-value</u> |
|--------------------|------------------------------------------------------------------|---------------------------|--------------------|----------------|
| Cyp2b10            | Cytochrome P450 2B10                                             | oxidoreductase activity   | -2.1               | 0.0001         |
| Aldh1a1            | Retinal dehydrogenase 1                                          | oxidoreductase activity   | 2                  | 5.00E-05       |
| Hpd                | 4-hydroxyphenylpyruvate dioxygenase                              | oxidoreductase activity   | 2.1                | 5.00E-05       |
| Hsd3b2             | 3 beta-hydroxysteroid dehydrogenase/Delta 5-->4-isomerase type 2 | oxidoreductase activity   | 2.2                | 5.00E-05       |
| Cyp2d9             | Cytochrome P450 2D9                                              | oxidoreductase activity   | 2.2                | 5.00E-05       |
| Fmo2               | Dimethylaniline monooxygenase [N-oxide-forming] 2                | oxidoreductase activity   | 2.2                | 5.00E-05       |
| Hsd17b13           | 17-beta-hydroxysteroid dehydrogenase 13                          | oxidoreductase activity   | 2.2                | 5.00E-05       |
| Nos1               | Nitric oxide synthase, brain                                     | oxidoreductase activity   | 2.2                | 5.00E-05       |
| Cyp2c65            | Cytochrome P450, family 2, subfamily c, polypeptide 65           | oxidoreductase activity   | 2.3                | 5.00E-05       |
| Cyp4b1             | Cytochrome P450 4B1                                              | oxidoreductase activity   | 2.3                | 0.00065        |
| Cyp4f14            | Leukotriene-B4 omega-hydroxylase 3                               | oxidoreductase activity   | 2.34               | 5.00E-05       |
| Hao2               | Hydroxyacid oxidase 2                                            | oxidoreductase activity   | 2.4                | 5.00E-05       |
| Nrxn2              | Protein Nrxn2                                                    | oxidoreductase activity   | 2.5                | 0.00025        |
| Ddo                | D-aspartate oxidase                                              | oxidoreductase activity   | 2.5                | 0.00035        |
| Dpyd               | Dihydropyrimidine dehydrogenase [NADP(+)]                        | oxidoreductase activity   | 2.6                | 5.00E-05       |
| Hsd3b3             | 3 beta-hydroxysteroid dehydrogenase/Delta 5-->4-isomerase type 3 | oxidoreductase activity   | 2.6                | 5.00E-05       |
| Cyp2c55            | Cytochrome P450 2C55                                             | oxidoreductase activity   | 2.7                | 5.00E-05       |
| Cd163              | Scavenger receptor cysteine-rich type 1 protein M130             | oxidoreductase activity   | 3.2                | 5.00E-05       |
| Cyp2d12            | Cytochrome P450, family 2, subfamily d, polypeptide 12           | oxidoreductase activity   | 3.7                | 5.00E-05       |
| Clvs2              | Clavesin-2                                                       | oxidoreductase activity   | 3.8                | 0.0011         |
| Cyp2e1             | Cytochrome P450 2E1                                              | oxidoreductase activity   | 4.1                | 5.00E-05       |

# Canonical Pathway Analysis

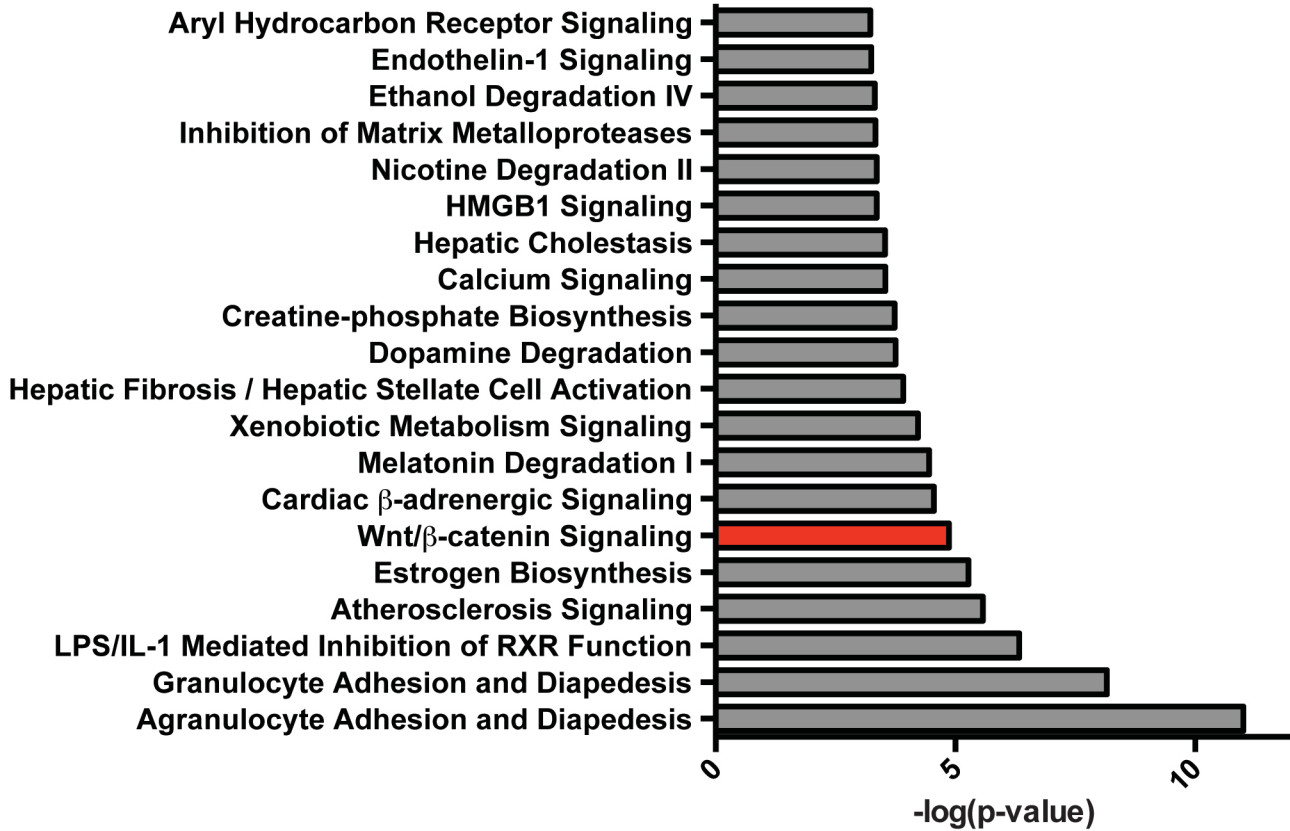

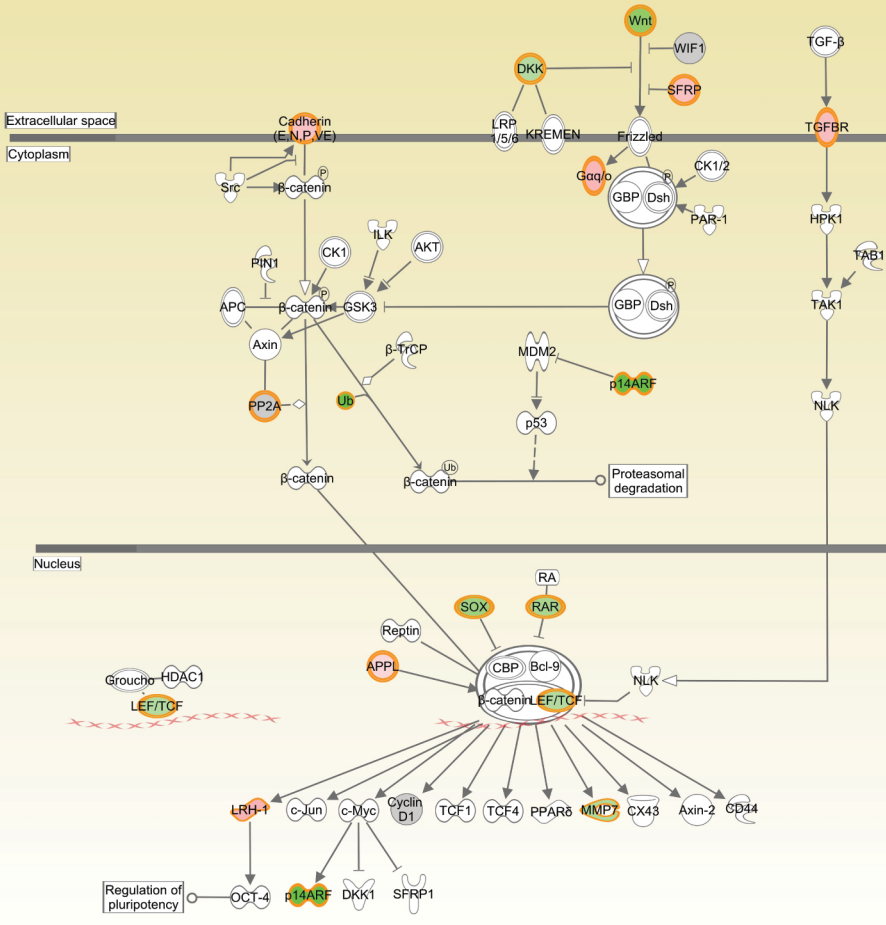

Supplementary Figure 9
